# Supplementary material for: Neutralizing Monoclonal Antibody, mAb 10D8, Is an Effective Detoxicant against Abrin-a Both In Vitro and In Vivo
Source: MDPI journal article supplement (doi:10.3390/toxins14030164), 2022-02-23
Supplement: s1 [file s1]

# Supplementary Materials: Neutralizing Monoclonal Antibody, mAb 10D8, Is an Effective Detoxicant against Abrin-a Both In Vitro and In Vivo

Zhi Li, Hua Xu, Bo Ma, Li Luo, Lei Guo, Pingping Zhang, Yong Zhao, Lili Wang and Jianwei Xie

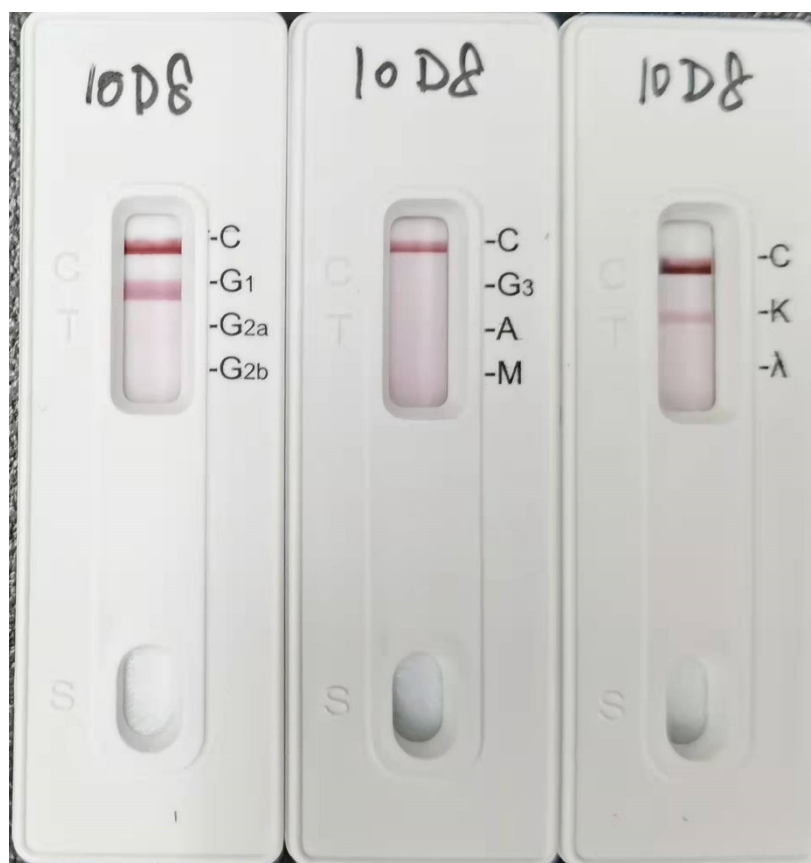

**Figure S1.** The subclasses of mAbs were by rapid isotyping cassettes represented by 10D8.

**Table S1.** The affinity and kinetics constants of mAbs against abrin-a [19] and isotypes.

|      | <b>ka (M<sup>-1</sup>s<sup>-1</sup>)</b> | <b>kd (s<sup>-1</sup>)</b>       | <b>Kd (pM)</b> | <b>isotype</b>   |
|------|------------------------------------------|----------------------------------|----------------|------------------|
| 10D8 | (13.1 ± 0.8) × 10 <sup>6</sup>           | (5.1 ± 0.3) × 10 <sup>-5</sup>   | 4.9 ± 0.5      | IgG1 Kappa Chain |
| 10C9 | (3.0 ± 0.1) × 10 <sup>6</sup>            | (0.6 ± 0.1) × 10 <sup>-5</sup>   | 2.2 ± 0.1      | IgG1 Kappa Chain |
| 5A10 | (1.4 ± 0.6) × 10 <sup>7</sup>            | (1.6 ± 0.004) × 10 <sup>-5</sup> | 1.4 ± 0.6      | IgG1 Kappa Chain |
| 5G7  | (1.3 ± 0.1) × 10 <sup>6</sup>            | (3.9 ± 0.9) × 10 <sup>-5</sup>   | 32 ± 1.0       | IgG1 Kappa Chain |

The affinity and kinetics constants of mAbs against abrin-a were determined by the SPR method established in our lab [19]. The subclasses of mAbs were determined by rapid isotyping cassettes (Thermo Fisher Scientific, Rockford, IL, USA).

## A Mascot Search Results

User : lzh  
Email : cpulzh96@163.com  
Search title : abrin a  
MS data file : abrin\_a.mgf  
Database : SwissProt 2021\_04 (565928 sequences; 204173280 residues)  
Taxonomy : Viridiplantae (Green Plants) (40988 sequences)  
Timestamp : 19 Jan 2022 at 11:21:10 GMT  
Enzyme : Trypsin  
Fixed modifications : Carbamidomethyl (C)  
Variable modifications : Acetyl (N-term)  
Mass values : Monoisotopic  
Protein Mass : Unrestricted  
Peptide Mass Tolerance :  $\pm 5$  ppm  
Fragment Mass Tolerance :  $\pm 5$  ppm  
Max Missed Cleavages : 1  
Instrument type : Default  
Number of queries : 7865  
Protein hits : [AB01\\_ABRP7](#) Abrin-a OS=Aborus precatorius OX=3816 PE=1 SV=2

| Query                                         | Mod(s)    | Mod(s)    | ppm       | Miss  | Score | Expect | Rank    | Uniqe | Peptide |                                                |
|-----------------------------------------------|-----------|-----------|-----------|-------|-------|--------|---------|-------|---------|------------------------------------------------|
| Bon's Online proteomic search (BON) Pro 10.02 |           |           |           |       |       |        |         |       |         |                                                |
| Observed                                      | M (kDa)   | M (kDa)   |           |       |       |        |         |       |         |                                                |
| 2384                                          | 302.1845  | 792.5041  | 792.5048  | -0.38 | 0     | 24     | 0.015   | 1     | 0       | K.GSPPFLA Q 2384 2385 2386 2387 2388 2389 2390 |
| 2385                                          | 495.7469  | 875.0171  | 875.0168  | 0.76  | 0     | 36     | 0.0006  | 1     | 0       | K.VTFVLA Q 2385 2386 2387 2388                 |
| 2386                                          | 501.7699  | 1041.0322 | 1041.0343 | 0.87  | 0     | 44     | 2.7e-06 | 1     | 0       | K.ACTQVLA R 2386 2387 2388 2389 2390           |
| 2387                                          | 607.3430  | 1272.0714 | 1272.0714 | -0.00 | 0     | 45     | 0.00018 | 1     | 0       | K.LTQVLA R 2387 2388 2389 2390                 |
| 2388                                          | 455.8392  | 1384.0686 | 1384.0685 | 0.13  | 0     | 2360   | 0.0008  | 1     | 0       | K.PTTSQVLA R 2388 2389 2390                    |
| 2389                                          | 463.3018  | 1394.0991 | 1394.0989 | 0.49  | 0     | 86     | 9.1e-09 | 1     | 0       | K.PTTSQVLA R 2389 2390                         |
| 2390                                          | 463.3030  | 1394.0335 | 1394.0334 | 0.40  | 0     | 79     | 6.7e-08 | 1     | 0       | K.PTTSQVLA R 2390 2391                         |
| 2391                                          | 455.8558  | 1384.0336 | 1384.0334 | 0.13  | 0     | 240    | 0.7e-05 | 1     | 0       | K.SQVLA R 2391 2392                            |
| 2392                                          | 730.8803  | 1565.7461 | 1565.7474 | -0.45 | 0     | 41     | 0.00082 | 1     | 0       | K.DANVLA R 2392 2393                           |
| 2393                                          | 605.3810  | 1041.0311 | 1041.0307 | 0.13  | 0     | 239    | 0.0005  | 1     | 0       | K.SQVLA R 2393 2394                            |
| 2394                                          | 465.4602  | 1041.7707 | 1041.7702 | -0.29 | 0     | 20     | 0.011   | 1     | 0       | K.SQVLA R 2394 2395                            |
| 2395                                          | 465.4441  | 1041.7705 | 1041.7702 | -0.19 | 0     | 141    | 0.00013 | 1     | 0       | K.SQVLA R 2395 2396                            |
| 2396                                          | 1175.0159 | 2345.1193 | 2345.1179 | -0.45 | 0     | 14     | 7.4e-06 | 1     | 0       | K.SQVLA R 2396 2397                            |
| 2397                                          | 730.3805  | 2345.1379 | 2345.1339 | -1.74 | 0     | 1473   | 0.00012 | 1     | 0       | K.SQVLA R 2397 2398                            |

## B Mascot Search Results

User : lzh  
Email : cpulzh96@163.com  
Search title : abrin b  
MS data file : abrin\_b.mgf  
Database : SwissProt 2021\_04 (565928 sequences; 204173280 residues)  
Taxonomy : Viridiplantae (Green Plants) (40988 sequences)  
Timestamp : 19 Jan 2022 at 11:31:46 GMT  
Enzyme : Trypsin  
Fixed modifications : Carbamidomethyl (C)  
Variable modifications : Acetyl (N-term)  
Mass values : Monoisotopic  
Protein Mass : Unrestricted  
Peptide Mass Tolerance :  $\pm 5$  ppm  
Fragment Mass Tolerance :  $\pm 5$  ppm  
Max Missed Cleavages : 1  
Instrument type : Default  
Number of queries : 7994  
Protein hits : [AB01\\_ABRP7](#) Abrin-b OS=Aborus precatorius OX=3816 PE=1 SV=1

| Protein IDs |  | Mod(s)    |           | Mod(s) |   | ppm   |         | Miss |   | Score |         | Expect |   | Rank |   | Uniqe |   | Peptide |                        |
|-------------|--|-----------|-----------|--------|---|-------|---------|------|---|-------|---------|--------|---|------|---|-------|---|---------|------------------------|
| Query       |  | Observed  |           | Mod(s) |   | ppm   |         | Miss |   | Score |         | Expect |   | Rank |   | Uniqe |   | Peptide |                        |
| 465.0905    |  | 865.3775  | 865.3772  | 0.24   | 0 | 0.007 | 1       | 0    | 0 | 0.007 | 1       | 0      | 0 | 0    | 0 | 0     | 0 | 0       | K.SQVLA R 2398 2399    |
| 438.7587    |  | 875.4968  | 875.4965  | 0.47   | 0 | 36    | 0.00043 | 1    | 0 | 36    | 0.00043 | 1      | 0 | 0    | 0 | 0     | 0 | 0       | K.SQVLA R 2399 2400    |
| 507.3430    |  | 1272.0714 | 1272.0714 | -0.00  | 0 | 44    | 6.5e-05 | 1    | 0 | 44    | 6.5e-05 | 1      | 0 | 0    | 0 | 0     | 0 | 0       | K.SQVLA R 2400 2401    |
| 412.1038    |  | 1235.7349 | 1235.7350 | 0.47   | 0 | 40    | 1.5e-05 | 1    | 0 | 40    | 1.5e-05 | 1      | 0 | 0    | 0 | 0     | 0 | 0       | K.SQVLA R 2401 2402    |
| 418.0751    |  | 1235.7356 | 1235.7359 | 0.47   | 0 | 51    | 1.5e-05 | 1    | 0 | 51    | 1.5e-05 | 1      | 0 | 0    | 0 | 0     | 0 | 0       | K.SQVLA R 2402 2403    |
| 495.7471    |  | 875.0176  | 875.0174  | 0.49   | 0 | 42    | 0.0007  | 1    | 0 | 42    | 0.0007  | 1      | 0 | 0    | 0 | 0     | 0 | 0       | K.SQVLA R 2403 2404    |
| 465.5451    |  | 1318.0440 | 1318.0401 | 0.39   | 0 | 132   | 0.0002  | 1    | 0 | 132   | 0.0002  | 1      | 0 | 0    | 0 | 0     | 0 | 0       | K.PTTSQVLA R 2404 2405 |
| 465.5398    |  | 1318.0446 | 1318.0401 | 0.36   | 0 | 89    | 6.4e-07 | 1    | 0 | 89    | 6.4e-07 | 1      | 0 | 0    | 0 | 0     | 0 | 0       | K.PTTSQVLA R 2405 2406 |
| 465.5349    |  | 1364.4032 | 1364.4034 | -0.14  | 0 | 71    | 3.5e-07 | 1    | 0 | 71    | 3.5e-07 | 1      | 0 | 0    | 0 | 0     | 0 | 0       | K.SQVLA R 2406 2407    |
| 455.8558    |  | 1384.0336 | 1384.0334 | 0.13   | 0 | 232   | 0.00091 | 1    | 0 | 232   | 0.00091 | 1      | 0 | 0    | 0 | 0     | 0 | 0       | K.SQVLA R 2407 2408    |
| 738.0776    |  | 1475.7407 | 1475.7409 | -0.12  | 0 | 27    | 0.0007  | 1    | 0 | 27    | 0.0007  | 1      | 0 | 0    | 0 | 0     | 0 | 0       | K.SQVLA R 2408 2409    |
| 511.0971    |  | 1563.0804 | 1563.0794 | 0.45   | 1 | 49    | 0.00074 | 1    | 0 | 49    | 0.00074 | 1      | 0 | 0    | 0 | 0     | 0 | 0       | K.SQVLA R 2409 2410    |
| 783.0986    |  | 1562.7407 | 1562.7415 | 0.44   | 0 | 147   | 0.0009  | 1    | 0 | 147   | 0.0009  | 1      | 0 | 0    | 0 | 0     | 0 | 0       | K.SQVLA R 2410 2411    |
| 522.9235    |  | 1565.7402 | 1565.7413 | 0.58   | 0 | 130   | 0.001   | 1    | 0 | 130   | 0.001   | 1      | 0 | 0    | 0 | 0     | 0 | 0       | K.SQVLA R 2411 2412    |
| 544.4626    |  | 1686.8123 | 1686.8122 | 0.14   | 0 | 129   | 0.008   | 1    | 0 | 129   | 0.008   | 1      | 0 | 0    | 0 | 0     | 0 | 0       | K.SQVLA R 2412 2413    |
| 625.9794    |  | 1896.8123 | 1896.8123 | 0.00   | 0 | 75    | 1.5e-07 | 1    | 0 | 75    | 1.5e-07 | 1      | 0 | 0    | 0 | 0     | 0 | 0       | K.SQVLA R 2413 2414    |
| 654.4548    |  | 1900.9746 | 1900.9747 | -0.09  | 0 | 79    | 6.4e-07 | 1    | 0 | 79    | 6.4e-07 | 1      | 0 | 0    | 0 | 0     | 0 | 0       | K.SQVLA R 2414 2415    |
| 993.2962    |  | 1984.7706 | 1984.7702 | -0.19  | 0 | 147   | 0.0009  | 1    | 0 | 147   | 0.0009  | 1      | 0 | 0    | 0 | 0     | 0 | 0       | K.SQVLA R 2415 2416    |
| 654.4608    |  | 1984.7701 | 1984.7702 | 0.45   | 0 | 14    | 1.2e-05 | 1    | 0 | 14    | 1.2e-05 | 1      | 0 | 0    | 0 | 0     | 0 | 0       | K.SQVLA R 2416 2417    |
| 745.0887    |  | 2226.2372 | 2226.2372 | 0.45   | 0 | 38    | 0.00021 | 1    | 0 | 38    | 0.00021 | 1      | 0 | 0    | 0 | 0     | 0 | 0       | K.SQVLA R 2417 2418    |

## C Mascot Search Results

User : lzh  
Email : cpulzh96@163.com  
Search title : AAG  
MS data file : AAG.mgf  
Database : SwissProt 2021\_04 (565928 sequences; 204173280 residues)  
Taxonomy : Viridiplantae (Green Plants) (40988 sequences)  
Timestamp : 19 Jan 2022 at 11:22:19 GMT  
Enzyme : Trypsin  
Fixed modifications : Carbamidomethyl (C)  
Variable modifications : Acetyl (N-term)  
Mass values : Monoisotopic  
Protein Mass : Unrestricted  
Peptide Mass Tolerance :  $\pm 5$  ppm  
Fragment Mass Tolerance :  $\pm 5$  ppm  
Max Missed Cleavages : 1  
Instrument type : Default  
Number of queries : 8013  
Protein hits : [AG01\\_ABRP7](#) Agglutinin-1 OS=Aborus precatorius OX=3816 GN=AAG PE=1 SV=1

|                                                     |            |           |            |                |                |               |         |      |       |                                              |
|-----------------------------------------------------|------------|-----------|------------|----------------|----------------|---------------|---------|------|-------|----------------------------------------------|
| 8.                                                  | MS1_000001 | Mass: 37  | Score: 644 | Method: MS2020 | Sequences: 648 | q-value: 0.35 |         |      |       |                                              |
| Apoptosis/Innate Immunity/OS0566 (Drosophila) P-191 |            |           |            |                |                |               |         |      |       |                                              |
| Query                                               | Observed   | Mod(s)    | Mod(s)     | ppm            | Miss           | Score         | Expect  | Rank | Uniqe | Peptide                                      |
| 2418                                                | 497.1899   | 732.3603  | 732.3603   | -0.22          | 0              | 41            | 0.00011 | 1    | 0     | K.SQVLA R 2418 2419 2420 2421 2422 2423 2424 |
| 2419                                                | 498.2081   | 970.3610  | 970.3611   | 0.58           | 0              | 54            | 3.9e-05 | 1    | 0     | K.SQVLA R 2419 2420 2421 2422 2423 2424      |
| 2420                                                | 524.1287   | 1046.4829 | 1046.4832  | 0.71           | 0              | 79            | 9.4e-08 | 1    | 0     | K.SQVLA R 2420 2421 2422 2423                |
| 2421                                                | 575.2548   | 1148.4946 | 1148.4945  | 0.06           | 0              | 32            | 0.00013 | 1    | 0     | K.SQVLA R 2421 2422                          |
| 2422                                                | 474.5109   | 1247.0233 | 1247.0231  | -0.44          | 0              | 47            | 0.0005  | 1    | 0     | K.SQVLA R 2422 2423                          |
| 2423                                                | 495.2153   | 1247.0247 | 1247.0243  | -0.45          | 0              | 133           | 0.00037 | 1    | 0     | K.SQVLA R 2423 2424                          |
| 2424                                                | 498.4214   | 1370.0282 | 1370.0286  | -0.25          | 0              | 42            | 9.9e-05 | 1    | 0     | K.SQVLA R 2424 2425 2426 2427                |
| 2425                                                | 467.0508   | 1370.0281 | 1370.0286  | 0.41           | 0              | 133           | 0.0005  | 1    | 0     | K.SQVLA R 2425 2426                          |

## D Mascot Search Results

User : lzh  
Email : cpulzh96@163.com  
Search title : abrin a  
MS data file : abrin\_a.mgf  
Database : SwissProt 2021\_04 (565928 sequences; 204173280 residues)  
Taxonomy : Viridiplantae (Green Plants) (40988 sequences)  
Timestamp : 19 Jan 2022 at 11:29:10 GMT  
Enzyme : Trypsin  
Fixed modifications : Carbamidomethyl (C)  
Variable modifications : Acetyl (N-term)  
Mass values : Monoisotopic  
Protein Mass : Unrestricted  
Peptide Mass Tolerance :  $\pm 5$  ppm  
Fragment Mass Tolerance :  $\pm 5$  ppm  
Max Missed Cleavages : 1  
Instrument type : Default  
Number of queries : 8173  
Protein hits : [AG01\\_ABRP7](#) Agglutinin-1 OS=Aborus precatorius OX=3816 GN=AAG PE=1 SV=1  
[AB01\\_ABRP7](#) Abrin-b OS=Aborus precatorius OX=3816 PE=1 SV=1  
[AB01\\_ABRP7](#) Abrin-a OS=Aborus precatorius OX=3816 PE=2 SV=1  
[AB01\\_ABRP7](#) Abrin-b OS=Aborus precatorius OX=3816 PE=2 SV=1

|  |  | AB04 AB05 |  | AB06 AB07 |  | AB08 AB09 |  | AB10 AB11 |  | AB12 AB13 |  | AB14 AB15 |  | AB16 AB17 |  | AB18 AB19 |  | AB20 AB21 |  | AB22 AB23 |  | AB24 AB25 |  | AB26 AB27 |  | AB28 AB29 |  | AB30 AB31 |  | AB32 AB33 |  | AB34 AB35 |  | AB36 AB37 |  | AB38 AB39 |  | AB40 AB41 |  | AB42 AB43 |  | AB44 AB45 |  | AB46 AB47 |  | AB48 AB49 |  | AB50 AB51 |  | AB52 AB53 |  | AB54 AB55 |  | AB56 AB57 |  | AB58 AB59 |  | AB60 AB61 |  | AB62 AB63 |  | AB64 AB65 |  | AB66 AB67 |  | AB68 AB69 |  | AB70 AB71 |  | AB72 AB73 |  | AB74 AB75 |  | AB76 AB77 |  | AB78 AB79 |  | AB80 AB81 |  | AB82 AB83 |  | AB84 AB85 |  | AB86 AB87 |  | AB88 AB89 |  | AB90 AB91 |  | AB92 AB93 |  | AB94 AB95 |  | AB96 AB97 |  | AB98 AB99 |  | AB100 AB101 |  | AB102 AB103 |  | AB104 AB105 |  | AB106 AB107 |  | AB108 AB109 |  | AB110 AB111 |  | AB112 AB113 |  | AB114 AB115 |  | AB116 AB117 |  | AB118 AB119 |  | AB120 AB121 |  | AB122 AB123 |  | AB124 AB125 |  | AB126 AB127 |  | AB128 AB129 |  | AB130 AB131 |  | AB132 AB133 |  | AB134 AB135 |  | AB136 AB137 |  | AB138 AB139 |  | AB140 AB141 |  | AB142 AB143 |  | AB144 AB145 |  | AB146 AB147 |  | AB148 AB149 |  | AB150 AB151 |  | AB152 AB153 |  | AB154 AB155 |  | AB156 AB157 |  | AB158 AB159 |  | AB160 AB161 |  | AB162 AB163 |  | AB164 AB165 |  | AB166 AB167 |  | AB168 AB169 |  | AB170 AB171 |  | AB172 AB173 |  | AB174 AB175 |  | AB176 AB177 |  | AB178 AB179 |  | AB180 AB181 |  | AB182 AB183 |  | AB184 AB185 |  | AB186 AB187 |  | AB188 AB189 |  | AB190 AB191 |  | AB192 AB193 |  | AB194 AB195 |  | AB196 AB197 |  | AB198 AB199 |  | AB200 AB201 |  | AB202 AB203 |  | AB204 AB205 |  | AB206 AB207 |  | AB208 AB209 |  | AB210 AB211 |  | AB212 AB213 |  | AB214 AB215 |  | AB216 AB217 |  | AB218 AB219 |  | AB220 AB221 |  | AB222 AB223 |  | AB224 AB225 |  | AB226 AB227 |  | AB228 AB229 |  | AB230 AB231 |  | AB232 AB233 |  | AB234 AB235 |  | AB236 AB237 |  | AB238 AB239 |  | AB240 AB241 |  | AB242 AB243 |  | AB244 AB245 |  | AB246 AB247 |  | AB248 AB249 |  | AB250 AB251 |  | AB252 AB253 |  | AB254 AB255 |  | AB256 AB257 |  | AB258 AB259 |  | AB260 AB261 |  | AB262 AB263 |  | AB264 AB265 |  | AB266 AB267 |  | AB268 AB269 |  | AB270 AB271 |  | AB272 AB273 |  | AB274 AB275 |  | AB276 AB277 |  | AB278 AB279 |  | AB280 AB281 |  | AB282 AB283 |  | AB284 AB285 |  | AB286 AB287 |  | AB288 AB289 |  | AB290 AB291 |  | AB292 AB293 |  | AB294 AB295 |  | AB296 AB297 |  | AB298 AB299 |  | AB300 AB301 |  | AB302 AB303 |  | AB304 AB305 |  | AB306 AB307 |  | AB308 AB309 |  | AB310 AB311 |  | AB312 AB313 |  | AB314 AB315 |  | AB316 AB317 |  | AB318 AB319 |  | AB320 AB321 |  | AB322 AB323 |  | AB324 AB325 |  | AB326 AB327 |  | AB328 AB329 |  | AB330 AB331 |  | AB332 AB333 |  | AB334 AB335 |  | AB336 AB337 |  | AB338 AB339 |  | AB340 AB341 |  | AB342 AB343 |  | AB344 AB345 |  | AB346 AB347 |  | AB348 AB349 |  | AB350 AB351 |  | AB352 AB353 |  | AB354 AB355 |  | AB356 AB357 |  | AB358 AB359 |  | AB360 AB361 |  | AB362 AB363 |  | AB364 AB365 |  | AB366 AB367 |  | AB368 AB369 |  | AB370 AB371 |  | AB372 AB373 |  | AB374 AB375 |  | AB376 AB377 |  | AB378 AB379 |  | AB380 AB381 |  | AB382 AB383 |  | AB384 AB385 |  | AB386 AB387 |  | AB388 AB389 |  | AB390 AB391 |  | AB392 AB393 |  | AB394 AB395 |  | AB396 AB397 |  | AB398 AB399 |  | AB400 AB401 |  | AB402 AB403 |  | AB404 AB405 |  | AB406 AB407 |  | AB408 AB409 |  | AB410 AB411 |  | AB412 AB413 |  | AB414 AB415 |  | AB416 AB417 |  | AB418 AB419 |  | AB420 AB421 |  | AB422 AB423 |  | AB424 AB425 |  | AB426 AB427 |  | AB428 AB429 |  | AB430 AB431 |  | AB432 AB433 |  | AB434 AB435 |  | AB436 AB437 |  | AB438 AB439 |  | AB440 AB441 |  | AB442 AB443 |  | AB444 AB445 |  | AB446 AB447 |  | AB448 AB449 |  | AB450 AB451 |  | AB452 AB453 |  | AB454 AB455 |  | AB456 AB457 |  | AB458 AB459 |  | AB460 AB461 |  | AB462 AB463 |  | AB464 AB465 |  | AB466 AB467 |  | AB468 AB469 |  | AB470 AB471 |  | AB472 AB473 |  | AB474 AB475 |  | AB476 AB477 |  | AB478 AB479 |  | AB480 AB481 |  | AB482 AB483 |  | AB484 AB485 |  | AB486 AB487 |  | AB488 AB489 |  | AB490 AB491 |  | AB492 AB493 |  | AB494 AB495 |  | AB496 AB497 |  | AB498 AB499 |  | AB500 AB501 |  | AB502 AB503 |  | AB504 AB505 |  | AB506 AB507 |  | AB508 AB509 |  | AB510 AB511 |  | AB512 AB513 |  | AB514 AB515 |  | AB516 AB517 |  | AB518 AB519 |  | AB520 AB521 |  | AB522 AB523 |  | AB524 AB525 |  | AB526 AB527 |  | AB528 AB529 |  | AB530 AB531 |  | AB532 AB533 |  | AB534 AB535 |  | AB536 AB537 |  | AB538 AB539 |  | AB540 AB541 |  | AB542 AB543 |  | AB544 AB545 |  | AB546 AB547 |  | AB548 AB549 |  | AB550 AB551 |  | AB552 AB553 |  | AB554 AB555 |  | AB556 AB557 |  | AB558 AB559 |  | AB560 AB561 |  | AB562 AB563 |  | AB564 AB565 |  | AB566 AB567 |  | AB568 AB569 |  | AB570 AB571 |  | AB572 AB573 |  | AB574 AB575 |  | AB576 AB577 |  | AB578 AB579 |  | AB580 AB581 |  | AB582 AB583 |  | AB584 AB585 |  | AB586 AB587 |  | AB588 AB589 |  | AB590 AB591 |  | AB592 AB593 |  | AB594 AB595 |  | AB596 AB597 |  | AB598 AB599 |  | AB600 AB601 |  | AB602 AB603 |  | AB604 AB605 |  | AB606 AB607 |  | AB608 AB609 |  | AB610 AB611 |  | AB612 AB613 |  | AB614 AB615 |  | AB616 AB617 |  | AB618 AB619 |  | AB620 AB621 |  | AB622 AB623 |  | AB624 AB625 |  | AB626 AB627 |  | AB628 AB629 |  | AB630 AB631 |  | AB632 AB633 |  | AB634 AB635 |  | AB636 AB637 |  | AB638 AB639 |  | AB640 AB641 |  | AB642 AB643 |  | AB644 AB645 |  | AB646 AB647 |  | AB648 AB649 |  | AB650 AB651 |  | AB652 AB653 |  | AB654 AB655 |  | AB656 AB657 |  | AB658 AB659 |  | AB660 AB661 |  | AB662 AB663 |  | AB664 AB665 |  | AB666 AB667 |  | AB668 AB669 |  | AB670 AB671 |  | AB672 AB673 |  | AB674 AB675 |  | AB676 AB677 |  | AB678 AB679 |  | AB680 AB681 |  | AB682 AB683 |  | AB684 AB685 |  | AB686 AB687 |  | AB688 AB689 |  | AB690 AB691 |  | AB692 AB693 |  | AB694 AB695 |  | AB696 AB697 |  | AB698 AB699 |  | AB700 AB701 |  | AB702 AB703 |  | AB704 AB705 |  | AB706 AB707 |  | AB708 AB709 |  | AB710 AB711 |  | AB712 AB713 |  | AB714 AB715 |  | AB716 AB717 |  | AB718 AB719 |  | AB720 AB721 |  | AB722 AB723 |  | AB724 AB725 |  | AB726 AB727 |  | AB728 AB729 |  | AB730 AB731 |  | AB732 AB733 |  | AB734 AB735 |  | AB736 AB737 |  | AB738 AB739 |  | AB740 AB741 |  | AB742 AB743 |  | AB744 AB745 |  | AB746 AB747 |  | AB748 AB749 |  | AB750 AB751 |  | AB752 AB753 |  | AB754 AB755 |  | AB756 AB757 |  | AB758 AB759 |  | AB760 AB761 |  | AB762 AB763 |  | AB764 AB765 |  | AB766 AB767 |  | AB768 AB769 |  | AB770 AB771 |  | AB772 AB773 |  | AB774 AB775 |  | AB776 AB777 |  | AB778 AB779 |  | AB780 AB781 |  | AB782 AB783 |  | AB784 AB785 |  | AB786 AB787 |  | AB788 AB789 |  | AB790 AB791 |  | AB792 AB793 |  | AB794 AB795 |  | AB796 AB797 |  | AB798 AB799 |  | AB800 AB801 |  | AB802 AB803 |  | AB804 AB805 |  | AB806 AB807 |  | AB808 AB809 |  | AB810 AB811 |  | AB812 AB813 |  | AB814 AB815 |  | AB816 AB817 |  | AB818 AB819 |  | AB820 AB821 |  | AB822 AB823 |  | AB824 AB825 |  | AB826 AB827 |  | AB828 AB829 |  | AB830 AB831 |  | AB832 AB833 |  | AB834 AB835 |  | AB836 AB837 |  | AB838 AB839 |  | AB840 AB841 |  | AB842 AB843 |  | AB844 AB845 |  | AB846 AB847 |  | AB848 AB849 |  | AB850 AB851 |  | AB852 AB853 |  | AB854 AB855 |  | AB856 AB857 |  | AB858 AB859 |  | AB860 AB861 |  | AB862 AB863 |  | AB864 AB865 |  | AB866 AB867 |  | AB868 AB869 |  | AB870 AB871 |  | AB872 AB873 |  | AB874 AB875 |  | AB876 AB877 |  | AB878 AB879 |  | AB880 AB881 |  | AB882 AB883 |  | AB884 AB885 |  | AB886 AB887 |  | AB888 AB889 |  | AB890 AB891 |  | AB892 AB893 |  | AB894 AB895 |  | AB896 AB897 |  | AB898 AB899 |  | AB900 AB901 |  | AB902 AB903 |  | AB904 AB905 |  | AB906 AB907 |  | AB908 AB909 |  | AB910 AB911 |  | AB912 AB913 |  | AB914 AB915 |  | AB916 AB917 |  | AB918 AB919 |  | AB920 AB921 |  | AB922 AB923 |  | AB924 AB925 |  | AB926 AB927 |  | AB928 AB929 |  | AB930 AB931 |  | AB932 AB933 |  | AB934 AB935 |  | AB936 AB937 |  | AB938 AB939 |  | AB940 AB941 |  | AB942 AB943 |  | AB944 AB945 |  | AB946 AB947 |  | AB948 AB949 |  | AB950 AB951 |  | AB952 AB953 |  | AB954 AB955 |  | AB956 AB957 |  | AB958 AB959 |  | AB960 AB961 |  | AB962 AB963 |  | AB964 AB965 |  | AB966 AB967 |  | AB968 AB969 |  | AB970 AB971 |  | AB972 AB973 |  | AB974 AB975 |  | AB976 AB977 |  | AB978 AB979 |  | AB980 AB981 |  | AB982 AB983 |  | AB984 AB985 |  | AB986 AB987 |  | AB988 AB989 |  | AB990 AB991 |  | AB992 AB993 |  | AB994 AB995 |  | AB996 AB997 |  | AB998 AB999 |  | AB1000 AB1001 |  | AB1002 AB1003 |  | AB1004 AB1005 |  | AB1006 AB1007 |  | AB1008 AB1009 |  | AB1010 AB1011 |  | AB1012 AB1013 |  | AB1014 AB1015 |  | AB1016 AB1017 |  | AB1018 AB1019 |  | AB1020 AB1021 |  | AB1022 AB1023 |  | AB1024 AB1025 |  | AB1026 AB1027 |  | AB1028 AB1029 |  | AB1030 AB1031 |  | AB1032 AB1033 |  | AB1034 AB1035 |  | AB1036 AB1037 |  | AB1038 AB1039 |  | AB1040 AB1041 |  | AB1042 AB1043 |  | AB1044 AB1045 |  | AB1046 AB1047 |  | AB1048 AB1049 |  | AB1050 AB1051 |  | AB1052 AB1053 |  | AB1054 AB1055 |  | AB1056 AB1057 |  | AB1058 AB1059 |  | AB1060 AB1061 |  | AB1062 AB1063 |  | AB1064 AB1065 |  | AB1066 AB1067 |  | AB1068 AB1069 |  | AB1070 AB1071 |  | AB1072 AB1073 |  | AB1074 AB1075 |  | AB1076 AB1077 |  | AB1078 AB1079 |  | AB1080 AB1081 |  | AB1082 AB1083 |  | AB1084 AB1085 |  | AB1086 AB1087 |  | AB1088 AB1089 |  | AB1090 AB1091 |  | AB1092 AB1093 |  | AB1094 AB1095 |  | AB1096 AB1097 |  | AB1098 AB1099 |  | AB1100 AB1101 |  | AB1102 AB1103 |  | AB1104 AB1105 |  | AB1106 AB1107 |  | AB1108 AB1109 |  | AB1110 AB1111 |  | AB1112 AB1113 |  | AB1114 AB1115 |  | AB1116 AB1117 |  | AB1118 AB1119 |  | AB1120 AB1121 |  | AB1122 AB1123 |  | AB1124 AB1125 |  | AB1126 AB1127 |  | AB1128 AB1129 |  | AB1130 AB1131 |  | AB1132 AB1133 |  | AB1134 AB1135 |  | AB1136 AB1137 |  | AB1138 AB1139 |  | AB1140 AB1141 |  | AB1142 AB1143 |  | AB1144 AB1145 |  | AB1146 AB1147 |  | AB1148 AB1149 |  | AB1150 AB1151 |  | AB1152 AB1153 |  | AB1154 AB1155 |  | AB1156 AB1157 |  | AB1158 AB1159 |  | AB1160 AB1161 |  | AB1162 AB1163 |  | AB1164 AB1165 |  | AB1166 AB1167 |  | AB1168 AB1169 |  | AB1170 AB1171 |  | AB1172 AB1173 |  | AB1174 AB1175 |  | AB1176 AB1177 |  | AB1178 AB1179 |  | AB1180 AB1181 |  | AB1182 AB1183 |  | AB1184 AB1185 |  | AB1186 AB1187 |  | AB1188 AB1189 |  | AB1190 AB1191 |  | AB1192 AB1193 |  | AB1194 AB1195 |  | AB1196 AB1197 |  | AB1198 AB1199 |  | AB1200 AB1201 |  | AB1202 AB1203 |  | AB1204 AB1205 |  | AB1206 AB1207 |  | AB1208 AB1209 |  | AB1210 AB1211 |  | AB1212 AB1213 |  | AB1214 AB1215 |  | AB1216 AB1217 |  | AB1218 AB1219 |  | AB1220 AB1221 |  | AB1222 AB1223 |  | AB1224 AB1225 |  | AB1226 AB1227 |  | AB1228 AB1229 |  | AB1230 AB1231 |  | AB1232 AB1233 |  | AB1234 AB1235 |  | AB1236 AB1237 |  | AB1238 AB1239 |  | AB1240 AB1241 |  | AB1242 AB1243 |  | AB1244 AB1245 |  | AB1246 AB1247 |  | AB1248 AB1249 |  | AB1250 AB1251 |  | AB1252 AB1253 |  | AB1254 AB1255 |  | AB1256 AB1257 |  | AB1258 AB1259 |  | AB1260 AB1261 |  | AB1262 AB1263 |  | AB1264 AB1265 |  | AB1266 AB1267 |  | AB1268 AB1269 |  | AB1270 AB1271 |  | AB1272 AB1273 |  | AB1274 AB1275 |  | AB1276 AB1277 |  | AB1278 AB1279 |  | AB1280 AB1281 |  | AB1282 AB1283 |  | AB1284 AB1285 |  | AB1286 AB1287 |  | AB1288 AB1289 |  | AB1290 AB1291 |  | AB1292 AB1293 |  | AB1294 AB1295 |  | AB1296 AB1297 |  | AB1298 AB1299 |  | AB1300 AB1301 |  | AB1302 AB1303 |  | AB1304 AB1305 |  | AB1306 AB1307 |  | AB1308 AB1309 |  | AB1310 AB1311 |  | AB1312 AB1313 |  | AB1314 AB1315 |  | AB1316 AB1317 |  | AB1318 AB1319 |  | AB1320 AB1321 |  | AB1322 AB1323 |  | AB1324 AB1325 |  | AB1326 AB1327 |  | AB1328 AB1329 |  | AB1330 AB1331 |  | AB1332 AB1333 |  | AB1334 AB1335 |  | AB1336 AB1337 |  | AB1338 AB1339 |  | AB1340 AB1341 |  | AB1342 AB1343 |  | AB1344 AB1345 |  | AB1346 AB1347 |  | AB1348 AB1349 |  | AB1350 AB1351 |  | AB1352 AB1353 |  | AB1354 AB1355 |  | AB1356 AB1357 |  | AB1358 AB1359 |  | AB1360 AB1361 |  | AB1362 AB1363 |  | AB1364 AB1365 |  | AB1366 AB1367 |  | AB1368 AB1369 |  | AB1370 AB1371 |  | AB1372 AB1373 |  | AB1374 AB1375 |  | AB1376 AB1377 |  | AB1378 AB1379 |  | AB1380 AB1381 |  | AB1382 AB1383 |  | AB1384 AB1385 |  | AB1386 AB1387 |  | AB1388 AB1389 |  | AB1390 AB1391 |  | AB1392 AB1393 |  | AB1394 AB1395 |  | AB1396 AB1397 |  | AB1398 AB1399 |  | AB1400 AB1401 |  | AB1402 AB1403 |  | AB1404 AB1405 |  | AB1406 AB1407 |  | AB1408 AB1409 |  | AB1410 AB1411 |  | AB1412 AB1413 |  | AB1414 AB1415 |  | AB1416 AB1417 |  | AB1418 AB1419 |  | AB1420 AB1421 |  | AB1422 AB1423 |  | AB1424 AB1425 |  | AB1426 AB1427 |  | AB1428 AB1429 |  | AB1430 AB1431 |  | AB1432 AB1433 |  | AB1434 AB1435 |  | AB1436 AB1437 |  | AB1438 AB1439 |  | AB1440 AB1441 |  | AB1442 AB1443 |  | AB1444 AB1445 |  | AB1446 AB1447 |  | AB1448 AB1449 |  | AB1450 AB1451 |  | AB1452 AB1453 |  | AB1454 AB1455 |  | AB1456 AB1457 |  | AB1458 AB1459 |  | AB1460 AB1461 |  | AB1462 AB1463 |  | AB1464 AB1465 |  | AB1466 AB1467 |  | AB1468 AB1469 |  | AB1470 AB1471 |  | AB1472 AB1473 |  | AB1474 AB1475 |  | AB1476 AB1477 |  | AB1478 AB1479 |  | AB1480 AB1481 |  | AB1482 AB1483 |  | AB1484 AB1485 |  | AB1486 AB1487 |  | AB1488 AB1489 |  | AB1490 AB1491 |  | AB1492 AB1493 |  | AB1494 AB1495 |  | AB1496 AB1497 |  | AB1498 AB1499 |  |
|--|--|-----------|--|-----------|--|-----------|--|-----------|--|-----------|--|-----------|--|-----------|--|-----------|--|-----------|--|-----------|--|-----------|--|-----------|--|-----------|--|-----------|--|-----------|--|-----------|--|-----------|--|-----------|--|-----------|--|-----------|--|-----------|--|-----------|--|-----------|--|-----------|--|-----------|--|-----------|--|-----------|--|-----------|--|-----------|--|-----------|--|-----------|--|-----------|--|-----------|--|-----------|--|-----------|--|-----------|--|-----------|--|-----------|--|-----------|--|-----------|--|-----------|--|-----------|--|-----------|--|-----------|--|-----------|--|-----------|--|-----------|--|-----------|--|-------------|--|-------------|--|-------------|--|-------------|--|-------------|--|-------------|--|-------------|--|-------------|--|-------------|--|-------------|--|-------------|--|-------------|--|-------------|--|-------------|--|-------------|--|-------------|--|-------------|--|-------------|--|-------------|--|-------------|--|-------------|--|-------------|--|-------------|--|-------------|--|-------------|--|-------------|--|-------------|--|-------------|--|-------------|--|-------------|--|-------------|--|-------------|--|-------------|--|-------------|--|-------------|--|-------------|--|-------------|--|-------------|--|-------------|--|-------------|--|-------------|--|-------------|--|-------------|--|-------------|--|-------------|--|-------------|--|-------------|--|-------------|--|-------------|--|-------------|--|-------------|--|-------------|--|-------------|--|-------------|--|-------------|--|-------------|--|-------------|--|-------------|--|-------------|--|-------------|--|-------------|--|-------------|--|-------------|--|-------------|--|-------------|--|-------------|--|-------------|--|-------------|--|-------------|--|-------------|--|-------------|--|-------------|--|-------------|--|-------------|--|-------------|--|-------------|--|-------------|--|-------------|--|-------------|--|-------------|--|-------------|--|-------------|--|-------------|--|-------------|--|-------------|--|-------------|--|-------------|--|-------------|--|-------------|--|-------------|--|-------------|--|-------------|--|-------------|--|-------------|--|-------------|--|-------------|--|-------------|--|-------------|--|-------------|--|-------------|--|-------------|--|-------------|--|-------------|--|-------------|--|-------------|--|-------------|--|-------------|--|-------------|--|-------------|--|-------------|--|-------------|--|-------------|--|-------------|--|-------------|--|-------------|--|-------------|--|-------------|--|-------------|--|-------------|--|-------------|--|-------------|--|-------------|--|-------------|--|-------------|--|-------------|--|-------------|--|-------------|--|-------------|--|-------------|--|-------------|--|-------------|--|-------------|--|-------------|--|-------------|--|-------------|--|-------------|--|-------------|--|-------------|--|-------------|--|-------------|--|-------------|--|-------------|--|-------------|--|-------------|--|-------------|--|-------------|--|-------------|--|-------------|--|-------------|--|-------------|--|-------------|--|-------------|--|-------------|--|-------------|--|-------------|--|-------------|--|-------------|--|-------------|--|-------------|--|-------------|--|-------------|--|-------------|--|-------------|--|-------------|--|-------------|--|-------------|--|-------------|--|-------------|--|-------------|--|-------------|--|-------------|--|-------------|--|-------------|--|-------------|--|-------------|--|-------------|--|-------------|--|-------------|--|-------------|--|-------------|--|-------------|--|-------------|--|-------------|--|-------------|--|-------------|--|-------------|--|-------------|--|-------------|--|-------------|--|-------------|--|-------------|--|-------------|--|-------------|--|-------------|--|-------------|--|-------------|--|-------------|--|-------------|--|-------------|--|-------------|--|-------------|--|-------------|--|-------------|--|-------------|--|-------------|--|-------------|--|-------------|--|-------------|--|-------------|--|-------------|--|-------------|--|-------------|--|-------------|--|-------------|--|-------------|--|-------------|--|-------------|--|-------------|--|-------------|--|-------------|--|-------------|--|-------------|--|-------------|--|-------------|--|-------------|--|-------------|--|-------------|--|-------------|--|-------------|--|-------------|--|-------------|--|-------------|--|-------------|--|-------------|--|-------------|--|-------------|--|-------------|--|-------------|--|-------------|--|-------------|--|-------------|--|-------------|--|-------------|--|-------------|--|-------------|--|-------------|--|-------------|--|-------------|--|-------------|--|-------------|--|-------------|--|-------------|--|-------------|--|-------------|--|-------------|--|-------------|--|-------------|--|-------------|--|-------------|--|-------------|--|-------------|--|-------------|--|-------------|--|-------------|--|-------------|--|-------------|--|-------------|--|-------------|--|-------------|--|-------------|--|-------------|--|-------------|--|-------------|--|-------------|--|-------------|--|-------------|--|-------------|--|-------------|--|-------------|--|-------------|--|-------------|--|-------------|--|-------------|--|-------------|--|-------------|--|-------------|--|-------------|--|-------------|--|-------------|--|-------------|--|-------------|--|-------------|--|-------------|--|-------------|--|-------------|--|-------------|--|-------------|--|-------------|--|-------------|--|-------------|--|-------------|--|-------------|--|-------------|--|-------------|--|-------------|--|-------------|--|-------------|--|-------------|--|-------------|--|-------------|--|-------------|--|-------------|--|-------------|--|-------------|--|-------------|--|-------------|--|-------------|--|-------------|--|-------------|--|-------------|--|-------------|--|-------------|--|-------------|--|-------------|--|-------------|--|-------------|--|-------------|--|-------------|--|-------------|--|-------------|--|-------------|--|-------------|--|-------------|--|-------------|--|-------------|--|-------------|--|-------------|--|-------------|--|-------------|--|-------------|--|-------------|--|-------------|--|-------------|--|-------------|--|-------------|--|-------------|--|-------------|--|-------------|--|-------------|--|-------------|--|-------------|--|-------------|--|-------------|--|-------------|--|-------------|--|-------------|--|-------------|--|-------------|--|-------------|--|-------------|--|-------------|--|-------------|--|-------------|--|-------------|--|-------------|--|-------------|--|-------------|--|-------------|--|-------------|--|-------------|--|-------------|--|-------------|--|-------------|--|-------------|--|-------------|--|-------------|--|-------------|--|-------------|--|-------------|--|-------------|--|-------------|--|-------------|--|-------------|--|-------------|--|-------------|--|-------------|--|-------------|--|-------------|--|-------------|--|-------------|--|-------------|--|-------------|--|-------------|--|-------------|--|-------------|--|-------------|--|-------------|--|-------------|--|-------------|--|-------------|--|-------------|--|-------------|--|-------------|--|-------------|--|-------------|--|-------------|--|-------------|--|-------------|--|-------------|--|-------------|--|-------------|--|-------------|--|-------------|--|-------------|--|-------------|--|-------------|--|-------------|--|-------------|--|-------------|--|-------------|--|-------------|--|-------------|--|-------------|--|-------------|--|-------------|--|-------------|--|-------------|--|-------------|--|-------------|--|-------------|--|-------------|--|-------------|--|-------------|--|-------------|--|-------------|--|-------------|--|-------------|--|-------------|--|-------------|--|-------------|--|-------------|--|-------------|--|-------------|--|-------------|--|-------------|--|-------------|--|-------------|--|-------------|--|-------------|--|-------------|--|---------------|--|---------------|--|---------------|--|---------------|--|---------------|--|---------------|--|---------------|--|---------------|--|---------------|--|---------------|--|---------------|--|---------------|--|---------------|--|---------------|--|---------------|--|---------------|--|---------------|--|---------------|--|---------------|--|---------------|--|---------------|--|---------------|--|---------------|--|---------------|--|---------------|--|---------------|--|---------------|--|---------------|--|---------------|--|---------------|--|---------------|--|---------------|--|---------------|--|---------------|--|---------------|--|---------------|--|---------------|--|---------------|--|---------------|--|---------------|--|---------------|--|---------------|--|---------------|--|---------------|--|---------------|--|---------------|--|---------------|--|---------------|--|---------------|--|---------------|--|---------------|--|---------------|--|---------------|--|---------------|--|---------------|--|---------------|--|---------------|--|---------------|--|---------------|--|---------------|--|---------------|--|---------------|--|---------------|--|---------------|--|---------------|--|---------------|--|---------------|--|---------------|--|---------------|--|---------------|--|---------------|--|---------------|--|---------------|--|---------------|--|---------------|--|---------------|--|---------------|--|---------------|--|---------------|--|---------------|--|---------------|--|---------------|--|---------------|--|---------------|--|---------------|--|---------------|--|---------------|--|---------------|--|---------------|--|---------------|--|---------------|--|---------------|--|---------------|--|---------------|--|---------------|--|---------------|--|---------------|--|---------------|--|---------------|--|---------------|--|---------------|--|---------------|--|---------------|--|---------------|--|---------------|--|---------------|--|---------------|--|---------------|--|---------------|--|---------------|--|---------------|--|---------------|--|---------------|--|---------------|--|---------------|--|---------------|--|---------------|--|---------------|--|---------------|--|---------------|--|---------------|--|---------------|--|---------------|--|---------------|--|---------------|--|---------------|--|---------------|--|---------------|--|---------------|--|---------------|--|---------------|--|---------------|--|---------------|--|---------------|--|---------------|--|---------------|--|---------------|--|---------------|--|---------------|--|---------------|--|---------------|--|---------------|--|---------------|--|---------------|--|---------------|--|---------------|--|---------------|--|---------------|--|---------------|--|---------------|--|---------------|--|---------------|--|---------------|--|---------------|--|---------------|--|---------------|--|---------------|--|---------------|--|---------------|--|---------------|--|---------------|--|---------------|--|---------------|--|---------------|--|---------------|--|---------------|--|---------------|--|---------------|--|---------------|--|---------------|--|---------------|--|---------------|--|---------------|--|---------------|--|---------------|--|---------------|--|---------------|--|---------------|--|---------------|--|---------------|--|---------------|--|---------------|--|---------------|--|---------------|--|---------------|--|---------------|--|---------------|--|---------------|--|---------------|--|---------------|--|---------------|--|---------------|--|---------------|--|---------------|--|---------------|--|---------------|--|---------------|--|---------------|--|---------------|--|---------------|--|---------------|--|---------------|--|---------------|--|---------------|--|---------------|--|---------------|--|---------------|--|---------------|--|---------------|--|---------------|--|---------------|--|---------------|--|---------------|--|---------------|--|---------------|--|---------------|--|---------------|--|---------------|--|---------------|--|---------------|--|---------------|--|---------------|--|---------------|--|---------------|--|---------------|--|---------------|--|---------------|--|---------------|--|---------------|--|---------------|--|---------------|--|---------------|--|---------------|--|---------------|--|---------------|--|---------------|--|---------------|--|---------------|--|---------------|--|---------------|--|---------------|--|---------------|--|---------------|--|---------------|--|---------------|--|---------------|--|---------------|--|---------------|--|---------------|--|---------------|--|
|--|--|-----------|--|-----------|--|-----------|--|-----------|--|-----------|--|-----------|--|-----------|--|-----------|--|-----------|--|-----------|--|-----------|--|-----------|--|-----------|--|-----------|--|-----------|--|-----------|--|-----------|--|-----------|--|-----------|--|-----------|--|-----------|--|-----------|--|-----------|--|-----------|--|-----------|--|-----------|--|-----------|--|-----------|--|-----------|--|-----------|--|-----------|--|-----------|--|-----------|--|-----------|--|-----------|--|-----------|--|-----------|--|-----------|--|-----------|--|-----------|--|-----------|--|-----------|--|-----------|--|-----------|--|-----------|--|-----------|--|-----------|--|-----------|--|-------------|--|-------------|--|-------------|--|-------------|--|-------------|--|-------------|--|-------------|--|-------------|--|-------------|--|-------------|--|-------------|--|-------------|--|-------------|--|-------------|--|-------------|--|-------------|--|-------------|--|-------------|--|-------------|--|-------------|--|-------------|--|-------------|--|-------------|--|-------------|--|-------------|--|-------------|--|-------------|--|-------------|--|-------------|--|-------------|--|-------------|--|-------------|--|-------------|--|-------------|--|-------------|--|-------------|--|-------------|--|-------------|--|-------------|--|-------------|--|-------------|--|-------------|--|-------------|--|-------------|--|-------------|--|-------------|--|-------------|--|-------------|--|-------------|--|-------------|--|-------------|--|-------------|--|-------------|--|-------------|--|-------------|--|-------------|--|-------------|--|-------------|--|-------------|--|-------------|--|-------------|--|-------------|--|-------------|--|-------------|--|-------------|--|-------------|--|-------------|--|-------------|--|-------------|--|-------------|--|-------------|--|-------------|--|-------------|--|-------------|--|-------------|--|-------------|--|-------------|--|-------------|--|-------------|--|-------------|--|-------------|--|-------------|--|-------------|--|-------------|--|-------------|--|-------------|--|-------------|--|-------------|--|-------------|--|-------------|--|-------------|--|-------------|--|-------------|--|-------------|--|-------------|--|-------------|--|-------------|--|-------------|--|-------------|--|-------------|--|-------------|--|-------------|--|-------------|--|-------------|--|-------------|--|-------------|--|-------------|--|-------------|--|-------------|--|-------------|--|-------------|--|-------------|--|-------------|--|-------------|--|-------------|--|-------------|--|-------------|--|-------------|--|-------------|--|-------------|--|-------------|--|-------------|--|-------------|--|-------------|--|-------------|--|-------------|--|-------------|--|-------------|--|-------------|--|-------------|--|-------------|--|-------------|--|-------------|--|-------------|--|-------------|--|-------------|--|-------------|--|-------------|--|-------------|--|-------------|--|-------------|--|-------------|--|-------------|--|-------------|--|-------------|--|-------------|--|-------------|--|-------------|--|-------------|--|-------------|--|-------------|--|-------------|--|-------------|--|-------------|--|-------------|--|-------------|--|-------------|--|-------------|--|-------------|--|-------------|--|-------------|--|-------------|--|-------------|--|-------------|--|-------------|--|-------------|--|-------------|--|-------------|--|-------------|--|-------------|--|-------------|--|-------------|--|-------------|--|-------------|--|-------------|--|-------------|--|-------------|--|-------------|--|-------------|--|-------------|--|-------------|--|-------------|--|-------------|--|-------------|--|-------------|--|-------------|--|-------------|--|-------------|--|-------------|--|-------------|--|-------------|--|-------------|--|-------------|--|-------------|--|-------------|--|-------------|--|-------------|--|-------------|--|-------------|--|-------------|--|-------------|--|-------------|--|-------------|--|-------------|--|-------------|--|-------------|--|-------------|--|-------------|--|-------------|--|-------------|--|-------------|--|-------------|--|-------------|--|-------------|--|-------------|--|-------------|--|-------------|--|-------------|--|-------------|--|-------------|--|-------------|--|-------------|--|-------------|--|-------------|--|-------------|--|-------------|--|-------------|--|-------------|--|-------------|--|-------------|--|-------------|--|-------------|--|-------------|--|-------------|--|-------------|--|-------------|--|-------------|--|-------------|--|-------------|--|-------------|--|-------------|--|-------------|--|-------------|--|-------------|--|-------------|--|-------------|--|-------------|--|-------------|--|-------------|--|-------------|--|-------------|--|-------------|--|-------------|--|-------------|--|-------------|--|-------------|--|-------------|--|-------------|--|-------------|--|-------------|--|-------------|--|-------------|--|-------------|--|-------------|--|-------------|--|-------------|--|-------------|--|-------------|--|-------------|--|-------------|--|-------------|--|-------------|--|-------------|--|-------------|--|-------------|--|-------------|--|-------------|--|-------------|--|-------------|--|-------------|--|-------------|--|-------------|--|-------------|--|-------------|--|-------------|--|-------------|--|-------------|--|-------------|--|-------------|--|-------------|--|-------------|--|-------------|--|-------------|--|-------------|--|-------------|--|-------------|--|-------------|--|-------------|--|-------------|--|-------------|--|-------------|--|-------------|--|-------------|--|-------------|--|-------------|--|-------------|--|-------------|--|-------------|--|-------------|--|-------------|--|-------------|--|-------------|--|-------------|--|-------------|--|-------------|--|-------------|--|-------------|--|-------------|--|-------------|--|-------------|--|-------------|--|-------------|--|-------------|--|-------------|--|-------------|--|-------------|--|-------------|--|-------------|--|-------------|--|-------------|--|-------------|--|-------------|--|-------------|--|-------------|--|-------------|--|-------------|--|-------------|--|-------------|--|-------------|--|-------------|--|-------------|--|-------------|--|-------------|--|-------------|--|-------------|--|-------------|--|-------------|--|-------------|--|-------------|--|-------------|--|-------------|--|-------------|--|-------------|--|-------------|--|-------------|--|-------------|--|-------------|--|-------------|--|-------------|--|-------------|--|-------------|--|-------------|--|-------------|--|-------------|--|-------------|--|-------------|--|-------------|--|-------------|--|-------------|--|-------------|--|-------------|--|-------------|--|-------------|--|-------------|--|-------------|--|-------------|--|-------------|--|-------------|--|-------------|--|-------------|--|-------------|--|-------------|--|-------------|--|-------------|--|-------------|--|-------------|--|-------------|--|-------------|--|-------------|--|-------------|--|-------------|--|-------------|--|-------------|--|-------------|--|-------------|--|-------------|--|-------------|--|-------------|--|-------------|--|-------------|--|-------------|--|-------------|--|-------------|--|-------------|--|-------------|--|-------------|--|-------------|--|-------------|--|-------------|--|-------------|--|-------------|--|-------------|--|-------------|--|-------------|--|-------------|--|-------------|--|-------------|--|-------------|--|-------------|--|-------------|--|-------------|--|-------------|--|-------------|--|-------------|--|-------------|--|-------------|--|-------------|--|-------------|--|-------------|--|-------------|--|-------------|--|-------------|--|-------------|--|-------------|--|-------------|--|-------------|--|-------------|--|-------------|--|-------------|--|-------------|--|-------------|--|-------------|--|-------------|--|-------------|--|-------------|--|-------------|--|-------------|--|-------------|--|-------------|--|-------------|--|---------------|--|---------------|--|---------------|--|---------------|--|---------------|--|---------------|--|---------------|--|---------------|--|---------------|--|---------------|--|---------------|--|---------------|--|---------------|--|---------------|--|---------------|--|---------------|--|---------------|--|---------------|--|---------------|--|---------------|--|---------------|--|---------------|--|---------------|--|---------------|--|---------------|--|---------------|--|---------------|--|---------------|--|---------------|--|---------------|--|---------------|--|---------------|--|---------------|--|---------------|--|---------------|--|---------------|--|---------------|--|---------------|--|---------------|--|---------------|--|---------------|--|---------------|--|---------------|--|---------------|--|---------------|--|---------------|--|---------------|--|---------------|--|---------------|--|---------------|--|---------------|--|---------------|--|---------------|--|---------------|--|---------------|--|---------------|--|---------------|--|---------------|--|---------------|--|---------------|--|---------------|--|---------------|--|---------------|--|---------------|--|---------------|--|---------------|--|---------------|--|---------------|--|---------------|--|---------------|--|---------------|--|---------------|--|---------------|--|---------------|--|---------------|--|---------------|--|---------------|--|---------------|--|---------------|--|---------------|--|---------------|--|---------------|--|---------------|--|---------------|--|---------------|--|---------------|--|---------------|--|---------------|--|---------------|--|---------------|--|---------------|--|---------------|--|---------------|--|---------------|--|---------------|--|---------------|--|---------------|--|---------------|--|---------------|--|---------------|--|---------------|--|---------------|--|---------------|--|---------------|--|---------------|--|---------------|--|---------------|--|---------------|--|---------------|--|---------------|--|---------------|--|---------------|--|---------------|--|---------------|--|---------------|--|---------------|--|---------------|--|---------------|--|---------------|--|---------------|--|---------------|--|---------------|--|---------------|--|---------------|--|---------------|--|---------------|--|---------------|--|---------------|--|---------------|--|---------------|--|---------------|--|---------------|--|---------------|--|---------------|--|---------------|--|---------------|--|---------------|--|---------------|--|---------------|--|---------------|--|---------------|--|---------------|--|---------------|--|---------------|--|---------------|--|---------------|--|---------------|--|---------------|--|---------------|--|---------------|--|---------------|--|---------------|--|---------------|--|---------------|--|---------------|--|---------------|--|---------------|--|---------------|--|---------------|--|---------------|--|---------------|--|---------------|--|---------------|--|---------------|--|---------------|--|---------------|--|---------------|--|---------------|--|---------------|--|---------------|--|---------------|--|---------------|--|---------------|--|---------------|--|---------------|--|---------------|--|---------------|--|---------------|--|---------------|--|---------------|--|---------------|--|---------------|--|---------------|--|---------------|--|---------------|--|---------------|--|---------------|--|---------------|--|---------------|--|---------------|--|---------------|--|---------------|--|---------------|--|---------------|--|---------------|--|---------------|--|---------------|--|---------------|--|---------------|--|---------------|--|---------------|--|---------------|--|---------------|--|---------------|--|---------------|--|---------------|--|---------------|--|---------------|--|---------------|--|---------------|--|---------------|--|---------------|--|---------------|--|---------------|--|---------------|--|---------------|--|---------------|--|---------------|--|---------------|--|---------------|--|---------------|--|---------------|--|---------------|--|---------------|--|---------------|--|---------------|--|---------------|--|---------------|--|---------------|--|---------------|--|---------------|--|---------------|--|---------------|--|---------------|--|---------------|--|---------------|--|---------------|--|---------------|--|---------------|--|---------------|--|---------------|--|---------------|--|---------------|--|---------------|--|---------------|--|---------------|--|---------------|--|---------------|--|---------------|--|---------------|--|

| Rank                                                                                                                                                                                                                                                                                                                                                                                                                                                                                                                                                                                                                                                                                                                                                                                                                                                                                                                                                                                                                                                                                                                                                                                                                                                                                                                                                                                                                                                                                                                                                                                                                                                                                                                                                                                                                                                                                                                                                                                                                                                                                                                                                                                                                                                                                                                                                                                                                                                                                                                                                                                                                                                                                                                                                                                                                                                                                                                                                                                                                                                                                                                                                                                                                                                                                                                                                                                                                                                                                                                                                                                                                                                                                                                                                                                                                                                                                                                                                                                                                                                                                                                                                                                                                                                                                                                                                                                                                                                                                                                                                                                                                                                                                                                                                                                                                                                                                                                                                                                                                                                                                                                                                                                                                                                                                                                                                                                                                                                                                                                                                                                                                                                                                                                                                                                                                                                                                                                                                                                                                                                                                                                                                                                                                                                                                                                                                                                                                                                                                                                                                                                                                                                                                                                                                                                                                                                                                                                                                                                                                                                                                                                                                                                                                                                                                                                                                                                                                                                                                                                                                                                                                                                                                                                                                                                                                                                                                                                                                                                                                                                                                                                                                                                                                                                                                                                                                                                                                                                                                                                                                                                                                                                                                                                                                                                                                                                                                                                                                                                                                                                                                                                                                                                                                                                                                                                                                                                                                                                                                                                                                                                                                                                                                                                                                                                                                                                                                                                                                                                                                                                                                                                                                                                                                                                                                                                                                                                                                                                                                                                                                                                                                                                                                                                                                                                                                                                                                                                                                                                                                                                                                                                                                                                                                                                                                                                                                                                                                                                                                                                                                                                                                                                                                                                                                                                                                                                                                                                                                                                                                                                                                                                                                                                                                                                                                                                                                                                                                                                                                                                                                                                                                            | Accession | Mass | Protein | Score | Expect | Rank | Uniqe | Peptide |
|---------------------------------------------------------------------------------------------------------------------------------------------------------------------------------------------------------------------------------------------------------------------------------------------------------------------------------------------------------------------------------------------------------------------------------------------------------------------------------------------------------------------------------------------------------------------------------------------------------------------------------------------------------------------------------------------------------------------------------------------------------------------------------------------------------------------------------------------------------------------------------------------------------------------------------------------------------------------------------------------------------------------------------------------------------------------------------------------------------------------------------------------------------------------------------------------------------------------------------------------------------------------------------------------------------------------------------------------------------------------------------------------------------------------------------------------------------------------------------------------------------------------------------------------------------------------------------------------------------------------------------------------------------------------------------------------------------------------------------------------------------------------------------------------------------------------------------------------------------------------------------------------------------------------------------------------------------------------------------------------------------------------------------------------------------------------------------------------------------------------------------------------------------------------------------------------------------------------------------------------------------------------------------------------------------------------------------------------------------------------------------------------------------------------------------------------------------------------------------------------------------------------------------------------------------------------------------------------------------------------------------------------------------------------------------------------------------------------------------------------------------------------------------------------------------------------------------------------------------------------------------------------------------------------------------------------------------------------------------------------------------------------------------------------------------------------------------------------------------------------------------------------------------------------------------------------------------------------------------------------------------------------------------------------------------------------------------------------------------------------------------------------------------------------------------------------------------------------------------------------------------------------------------------------------------------------------------------------------------------------------------------------------------------------------------------------------------------------------------------------------------------------------------------------------------------------------------------------------------------------------------------------------------------------------------------------------------------------------------------------------------------------------------------------------------------------------------------------------------------------------------------------------------------------------------------------------------------------------------------------------------------------------------------------------------------------------------------------------------------------------------------------------------------------------------------------------------------------------------------------------------------------------------------------------------------------------------------------------------------------------------------------------------------------------------------------------------------------------------------------------------------------------------------------------------------------------------------------------------------------------------------------------------------------------------------------------------------------------------------------------------------------------------------------------------------------------------------------------------------------------------------------------------------------------------------------------------------------------------------------------------------------------------------------------------------------------------------------------------------------------------------------------------------------------------------------------------------------------------------------------------------------------------------------------------------------------------------------------------------------------------------------------------------------------------------------------------------------------------------------------------------------------------------------------------------------------------------------------------------------------------------------------------------------------------------------------------------------------------------------------------------------------------------------------------------------------------------------------------------------------------------------------------------------------------------------------------------------------------------------------------------------------------------------------------------------------------------------------------------------------------------------------------------------------------------------------------------------------------------------------------------------------------------------------------------------------------------------------------------------------------------------------------------------------------------------------------------------------------------------------------------------------------------------------------------------------------------------------------------------------------------------------------------------------------------------------------------------------------------------------------------------------------------------------------------------------------------------------------------------------------------------------------------------------------------------------------------------------------------------------------------------------------------------------------------------------------------------------------------------------------------------------------------------------------------------------------------------------------------------------------------------------------------------------------------------------------------------------------------------------------------------------------------------------------------------------------------------------------------------------------------------------------------------------------------------------------------------------------------------------------------------------------------------------------------------------------------------------------------------------------------------------------------------------------------------------------------------------------------------------------------------------------------------------------------------------------------------------------------------------------------------------------------------------------------------------------------------------------------------------------------------------------------------------------------------------------------------------------------------------------------------------------------------------------------------------------------------------------------------------------------------------------------------------------------------------------------------------------------------------------------------------------------------------------------------------------------------------------------------------------------------------------------------------------------------------------------------------------------------------------------------------------------------------------------------------------------------------------------------------------------------------------------------------------------------------------------------------------------------------------------------------------------------------------------------------------------------------------------------------------------------------------------------------------------------------------------------------------------------------------------------------------------------------------------------------------------------------------------------------------------------------------------------------------------------------------------------------------------------------------------------------------------------------------------------------------------------------------------------------------------------------------------------------------------------------------------------------------------------------------------------------------------------------------------------------------------------------------------------------------------------------------------------------------------------------------------------------------------------------------------------------------------------------------------------------------------------------------------------------------------------------------------------------------------------------------------------------------------------------------------------------------------------------------------------------------------------------------------------------------------------------------------------------------------------------------------------------------------------------------------------------------------------------------------------------------------------------------------------------------------------------------------------------------------------------------------------------------------------------------------------------------------------------------------------------------------------------------------------------------------------------------------------------------------------------------------------------------------------------------------------------------------------------------------------------------------------------------------------------------------------------------------------------------------------------------------------------------------------------------------------------------------------------------------------------------------------------------------------------------------------------------------------------------------------------------------------------------------------------------------------------------------------------------------------------------------------------------------------------------------------------------------------------------------------------------------------------------------------------------------------------------------------------------------------------------------------------------------------------------------------------------------------------------------------------------------------------------------------------------------------------------------------------------------------------------------------------------------------------------------------------------------------------------------------------------------------------------------------------------------------------------------------------------------------------------------------------------------------------------|-----------|------|---------|-------|--------|------|-------|---------|
| Search Results: 100000000000000000000000000000000000000000000000000000000000000000000000000000000000000000000000000000000000000000000000000000000000000000000000000000000000000000000000000000000000000000000000000000000000000000000000000000000000000000000000000000000000000000000000000000000000000000000000000000000000000000000000000000000000000000000000000000000000000000000000000000000000000000000000000000000000000000000000000000000000000000000000000000000000000000000000000000000000000000000000000000000000000000000000000000000000000000000000000000000000000000000000000000000000000000000000000000000000000000000000000000000000000000000000000000000000000000000000000000000000000000000000000000000000000000000000000000000000000000000000000000000000000000000000000000000000000000000000000000000000000000000000000000000000000000000000000000000000000000000000000000000000000000000000000000000000000000000000000000000000000000000000000000000000000000000000000000000000000000000000000000000000000000000000000000000000000000000000000000000000000000000000000000000000000000000000000000000000000000000000000000000000000000000000000000000000000000000000000000000000000000000000000000000000000000000000000000000000000000000000000000000000000000000000000000000000000000000000000000000000000000000000000000000000000000000000000000000000000000000000000000000000000000000000000000000000000000000000000000000000000000000000000000000000000000000000000000000000000000000000000000000000000000000000000000000000000000000000000000000000000000000000000000000000000000000000000000000000000000000000000000000000000000000000000000000000000000000000000000000000000000000000000000000000000000000000000000000000000000000000000000000000000000000000000000000000000000000000000000000000000000000000000000000000000000000000000000000000000000000000000000000000000000000000000000000000000000000000000000000000000000000000000000000000000000000000000000000000000000000000000000000000000000000000000000000000000000000000000000000000000000000000000000000000000000000000000000000000000000000000000000000000000000000000000000000000000000000000000000000000000000000000000000000000000000000000000000000000000000000000000000000000000000000000000000000000000000000000000000000000000000000000000000000000000000000000000000000000000000000000000000000000000000000000000000000000000000000000000000000000000000000000000000000000000000000000000000000000000000000000000000000000000000000000000000000000000000000000000000000000000000000000000000000000000000000000000000000000000000000000000000000000000000000000000000000000000000000000000000000000000000000000000000000000000000000000000000000000000000000000000000000000000000000000000000000000000000000000000000000000000000000000000000000000000000000000000000000000000000000000000000000000000000000000000000000000000000000000000000000000000000000000000000000000000000000000000000000000000000000000000000000000000000000000000000000000000000000000000000000000000000000000000000000000000000000000000000000000000000000000000000000000000000000000000000000000000000000000000000000000000000000000000000000000000000000000000000000000000000000000000000000000000000000000000000000000000000000000000000000000000000000000000000000000000000000000000000000000000000000000000000000000000000000000000000000000000000000000000000000000000000000000000000000000000000000000000000000000000000000000000000000000000000000000000000000000000000000000000000000000000000000000000000000000000000000000000000000000000000000000000000000000000000000000000000000000000000000000000000000000000000000000000000000000000000000000000000000000000000000000000000000000000000000000000000000000000000000000000000000000000000000000000000000000000000000000000000000000000000000000000000000000000000000000000000000000000000000000000000000000000000000000000000000000000000000000000000000000000000000000000000000000000000000000000000000000000000000000000000000000000000000000000000000000000000000000000000000000000000000000000000000000000000000000000000000000000000000000000000000000000000000000000000000000000000000000000000000000000000000000000000000000000000000000000000000000000000000000000000000000000000000000000000000000000000000000000000000000000000000000000000000000000000000000000000000000000000000000000000000000000000000000000000000000000000000000000000000000000000000000000000000000000000000000000000000000000000000000000000000000000000000000000000000000000000000000000000000000000000000000000000000000000000000000000000000000000000000000000000000000000000000000000000000000000000000000000000000000000000000000000000000000000000000000000000000000000000000000000000000000000000000000000000000000000000000000000000000000000000000000000000000000000000000000000000000000000000000000000000000000000000000000000000000000000000000000000000000000000000000000000000000000000000000000000000000000000000000000000000000000000000000000000000000000000000000000000000000000000000000000000000000000000000000000000000000000000000000000000000000000000000000000000000000000000000000000000000000000000000000000000000000000000000000000000000000000000000000000000000000000000000000000000000000000000000000000000000000000000000000000000000000000000000000000000000000000000000000000000000000000000000000000000000000000000000000000000000000000000000000000000000000000000000000000000000000000000000000000000000000000000000000000000000000000000000000000000000000000000000000000000000000000000000000000000000000000000000000000000000000000000000000000000000000000000000000000000000000000000000000000000000000000000000000000000000000000000000000000000000000000000000000000000000000000000000000000000000000000000000000000000000000000000000000000000000000000000000000000000000000000000000000000000000000000000000000000000000000000000000000000000000000000000000000000000000000000000000000000000000000000000000000000000000000000000000000000000000000000000000000000000000000000000000000000000000000000000000000000000000000000000000000000000000000000000000000000000000000000000000000000000000000000000000000000000000000000000000000000000000000000000000000000000000000000000000000000000000000000000000000000000000000000000000000000000000000000000000000000000000000000000000000000000000000000000000000000000000000000000000000000000000000000000000000000000000000000000000000000000000000000000000000000000000000000000000000000000000000000000000000000000000000000000000000000000000000000000000000000000000000000000000000000000000000000000000000000000000000000000000000000000000000000000000000000000000000000000000000000000000000000000000000000000000000000000000000000000000000000000000000000000000000000000000000000000000000000000000000000000000000000000000000000000000000000000000000000000000000000000000000000000000000000000000000000000000000000000000000000000000000000000000000000000000000000000000000000000000000000000000000000000000000000000000000000000000000000000000000000000000000000000000000000000000000000000000000000000000000000000000000000000000000000000000000000000000000000000000000000000000000000000000000000000000000000000000000000000000000000000000000000000000000000000000000000000000000000000000000000000000000000000000000000000000000000000000000000000000000000000000000000000000000000000000000000000000000000000000000000000000000000000000000000000000000000000000000000000000000000000000000000000000000000000000000000000000000000000000000000000000000000000000000000000000000000000000000000000000000000000000000000000000000000000000000000000000000000000000000000000000000000000000000000000000000000000000000000000000000000000000000000000000000000000000000000000000000000000000000000000000000000000000000000000000000000000000000000000000000000000000000000000000000000000000000000000000000000000000000000000000000000000000000000000000000000000000000000000000000000000000000000000000000000000000000000000000000000000000000000000000000000000000000000000000000000000000000000000000000000000000000000000000000000000000000000000000000000000000000000000000000000000000000000000000000000000000000000000000000000000000000000000000000000000000000000000000000000000000000000000000000000000000000000000000000000000000000000000000000000000000000000000000000000000000000000000000000000000000000000000000000000000000000000000000000000000000000000000000000000000000000000000000000000000000000000000000000000000000000000000000000000000000000000000000000000000000000000000000000000000000000000000000000000000000000000000000000000000000000000000000000000000000000000000000000000000000000000000000000000000000000000000000000000000000000000000000000000000000000000000000000000000000000000000000000000000000000000000000000000000000000000000000000000000000000000000000000000000000000000000000000000000000000000000000000000000000000000000000000000000000000000000000000000000000000000000000000000000000000000000000000000000000000000000000000000000000000000000000000000000000000000000000000000000000000000000000000000000000000000000000000000000000000000000000000000000000000000000000000000000000000000000000000000000000000000000000000000000000000000000000000000000000000000000000000000000000000000000000000000000000000000000000000000000000000000000000000000000000000000000000000000000000000000000000000000000000000000000000000000000000000000000000000000000000000000000000000000000000000000000000000000000000000000000000000000000000000000000000000000000000000000000000000000000000000000000000000000000000000000000000000000000000000000000000000000000000000000000000000000000000000000000000000000000000000000000000000000000000000000000000000000000000000000000000000000000000000000000000000000000000000000000000000000000000000000000000000000000000000000000000000000000000000000000000000000000000000000000000000000000000000000000000000000000000000000000000000000000000000000000000000000000000000000000000000000000000000000000000000000000000000000000000000000000000000000000000000000000000000000000000000000000000000000000000000000000000000000000000000000000000000000000000000000000000000000000000000000000000000000000000000000000000000000000000000000000000000000000000000000000000000000000000000000000000000000000000000000000000000000000000000000000000000000000000000000000000000000000000000000000000000000000000000000000000000000000000000000000000000000000000000000000000000000000000000000000000000000000000000000000000000000000000000000000000000000000000000000000000000000000000000000000000000000000000000000000000000000000000000000000000000000000000000000000000000000000000000000000000000000000000000000000000000000000000000000000000000000000000000000000000000000000000000000000000000000000000000000000000000000000000000000000000000000000000000000000000000000000000000000000000000000000000000000000000000000000000000000000000000000000000000000000000000000000000000000000000000000000000000000000000000000000000000000000000000000000000000000000000000000000000000000000000000000000000000000000000000000000000000000000000000000000000000000000000000000000000000000000000000000000000000000000000000000000000000000000000000000000000000000000000000000000000000000000000000000000000000000000000000000000000000000000000000000000000000000000000000000000000000000000000000000000000000000000000000000000000000000000000000000000000000000000000000000000000000000000000000000000000000000000000000000000000000000000000000000000000000000000000000000000000000000000000000000000000000000000000000000000000000000000000000000000000000000000000000000000000000000000000000000000000000000000000000000000000000000000000000000000000000000000000000000000000000000000000000000000000000000000000000000000000000000000000000000000000000000000000000000000000000000000000000000000000000000000000000000000000000000000000000000000000000000000000000000000000000000000000000000000000000000000000000000000000000000000000000000000000000000000000000000000000000000000000000000000000000000000000000000000000000000000000000000000000000000000000000000000000000000000000000000000000000000000000000000000000000000000000000000000000000000000000000000000000000000000000000000000000000000000000000000000000000000000000000000000000000000000000000000000000000000000 |           |      |         |       |        |      |       |         |

| Query                                         | Observed | Mod(s)    | Mod(s)    | ppm   | Miss | Score | Expect  | Rank | Uniqe | Peptide                                                                                                                                                                                  |
|-----------------------------------------------|----------|-----------|-----------|-------|------|-------|---------|------|-------|------------------------------------------------------------------------------------------------------------------------------------------------------------------------------------------|
| allow MS/MS tolerance 0.050000 GC-MS/MS 10000 |          |           |           |       |      |       |         |      |       |                                                                                                                                                                                          |
| 2454                                          | 302.1847 | 792.5049  | 792.5048  | -0.00 | 0    | 29    | 0.0003  | 1    | 0     | K.SQVLA R 2454 2455 2456 2457 2458 2459                                                                                                                                                  |
| 2455                                          | 495.7469 | 875.0173  | 875.0168  | 0.76  | 0    | 36    | 0.0006  | 1    | 0     | K.SQVLA R 2455 2456 2457 2458                                                                                                                                                            |
| 2456                                          | 501.7697 | 1041.0319 | 1041.0343 | 0.54  | 0    | 44    | 0.00012 | 1    | 0     | K.SQVLA R 2456 2457 2458 2459                                                                                                                                                            |
| 2457                                          | 607.3430 | 1272.0715 | 1272.0714 | -0.09 | 0    | 45    | 1.3e-07 | 1    | 0     | K.SQVLA R 2457 2458 2459                                                                                                                                                                 |
| 2458                                          | 455.8558 | 1384.0335 | 1384.0334 | 0.13  | 0    | 47    | 7.9e-07 | 1    | 0     | K.SQVLA R 2458 2459                                                                                                                                                                      |
| 2459                                          | 455.8558 | 1384.0335 | 1384.0334 | -0.22 | 0    | 142   | 0.0003  | 1    | 0     | K.SQVLA R 2459 2460                                                                                                                                                                      |
| 2460                                          | 455.8558 | 1384.0335 | 1384.0334 | 0.13  | 0    | 141   | 1.6e-06 | 1    | 0     | K.SQVLA R 2460 2461                                                                                                                                                                      |
| 2461                                          | 515.0673 | 1563.0801 | 1563.0794 | 0.42  | 1    | 46    | 0.00019 | 1    | 0     | K.SQVLA R 2461 2462                                                                                                                                                                      |
| 2462                                          | 764.0897 | 1562.7409 | 1562.7414 | -0.31 | 0    | 43    | 0.0009  | 1    | 0     | K.SQVLA R 2462 2463                                                                                                                                                                      |
| 2463                                          | 629.9792 | 1896.8126 | 1896.8122 | -0.20 | 0    | 75    | 1.5e-07 | 1    | 0     | K.SQVLA R 2463 2464                                                                                                                                                                      |
| 2464                                          | 654.4548 | 1986.8123 | 1986.8127 | 0.20  | 0    | 47    | 0.00013 | 1    | 0     | K.SQVLA R 2464 2465                                                                                                                                                                      |
| 2465                                          | 662.8086 | 1986.7941 | 1986.7952 | 0.44  | 0    | 40    | 0.00011 | 1    | 0     | K.SQVLA R 2465 2466                                                                                                                                                                      |
| 2466                                          | 743.0846 | 2145.0345 | 2145.0329 | -0.19 | 0    | 48    | 0.00011 | 1    | 0     | K.SQVLA R 2466 2467 2468 2469 2470 2471 2472 2473 2474 2475 2476 2477 2478 2479 2480 2481 2482 2483 2484 2485 2486 2487 2488 2489 2490 2491 2492 2493 2494 2495 2496 2497 2498 2499 2500 |
